# Supplementary material for: Genomic and Transcriptomic Analysis of Pea (Pisum sativum L.) Breeding Line ‘Triumph’ with High Symbiotic Responsivity
Source: Preprints.org preprint supplement (doi:10.20944/preprints202311.1031.v1), 2023-11-15
Supplement: Supplementary file 1 [file supplementary]

## Sheet: DEGS (rw, control) in Trm & Ven
Common DEGs in 'Triumph' and 'Vendevil' compared to 'Classic'
P. sativum genome ID	Annotation	Vendevil_logFC	Triumph_logFC
evm.TU.scaffold_2720.269	Disease resistance response protein Pi49 OS=Pisum sativum (sp|p14710|drr3_pea : 290.0)	-2.1139	-2.1669
evm.TU.scaffold_3194.310_evm.TU.scaffold_3194.314	protease (SBT4) | cucumisin	3.46729	7581-03-01

## Sheet: DEGS (rw, inoc) in Trm & Ven
Common DEGs in 'Triumph' and 'Vendevil' compared to 'Classic'
P. sativum genome ID	Annotation	Vendevil_logFC	Triumph_logFC
evm.TU.contig_1113.27	Leghemoglobin Lb5-10 OS=Pisum sativum (sp|o48668|lgb2_pea : 273.0)	-1.26111174766836	-1.25659158207922
evm.TU.contig_1149.225	no hits & (original description: none)	1.75258768924612	2.13939802993746
evm.TU.contig_121.143	Protein PMR5 OS=Arabidopsis thaliana (sp|q9luz6|tbl44_arath : 386.0)	-1.28038578714687	-1.70356619096098
evm.TU.contig_121.144	glutamine-dependent asparagine synthetase	-1.27145603414318	-1.67145492760998
evm.TU.contig_121.555	plastidial phosphoglucomutase	-1.564762950222	-2.80652508259296
evm.TU.contig_1214.120	no hits & (original description: none)	-2.20097736035035	-1.66080143907465
evm.TU.contig_130.68	Carbonic anhydrase, chloroplastic OS=Spinacia oleracea (sp|p16016|cahc_spiol : 218.0)	-1.47052644562113	-1.69660792709839
evm.TU.contig_1670.1	no hits & (original description: none)	-0.989956663844118	-1.39623817905601
evm.TU.contig_207.4_evm.TU.contig_207.5	Protein trichome birefringence-like 2 OS=Arabidopsis thaliana (sp|q8vyr3|tbl2_arath : 559.0)	-0.927051169718994	-1.13286436594955
evm.TU.contig_535.38	brassinosteroid receptor kinase regulator protein (MSBP)	5.51079023908522	2.92648320681649
evm.TU.scaffold_1034.321	transcription factor (ERF)	-1.09214031897871	-1.6879285981541
evm.TU.scaffold_1169.406	tonoplast intrinsic protein (TIP)	1.32481679880066	1.17355973813485
evm.TU.scaffold_1544.34	Enzyme classification.EC_1 oxidoreductases.EC_1.3 oxidoreductase acting on CH-CH group of donor(50.1.3 : 657.5) & 12-oxophytodienoate reductase 1 OS=Solanum lycopersicum (sp|q9xg54|opr1_sollc : 550.0)	-1.71673113673491	-1.36691519025717
evm.TU.scaffold_1719.172	no hits & (original description: none)	-1.64623398238115	-1.60249730273262
evm.TU.scaffold_3991.14	Leghemoglobin Lb120-8 OS=Pisum sativum (sp|q9saz1|lgb4_pea : 191.0)	-2.28440361435087	-1.24839956803949
evm.TU.scaffold_3991.15	Leghemoglobin Lb120-34 OS=Pisum sativum (sp|q9saz0|lgb6_pea : 262.0)	-2.49327706058073	-1.11279209454564
evm.TU.scaffold_810.82	Nodule lectin OS=Pisum sativum (sp|q40987|lecr_pea : 315.0)	-1.50725857772901	-1.6038135298215
evm.TU.scaffold_894.164	thiol-disulfide oxidoreductase (ERO)	-0.932134164475996	-1.34600022502464
evm.TU.contig_1162.3	Putative germin-like protein 2	3.26532	3.79313

## Sheet: DEGS (sh, control) in Trm & Ven
Common DEGs in 'Triumph' and 'Vendevil' compared to 'Classic'
P. sativum genome ID	Annotation	Vendevil_logFC	Triumph_logFC
evm.TU.contig_1149.299	Enzyme classification.EC_3 hydrolases.EC_3.4 hydrolase acting on peptide bond (peptidase)(50.3.4 : 294.9) & Probable cysteine protease RD21B OS=Arabidopsis thaliana (sp|q9fmh8|rd21b_arath : 264.0)	-3.5377864970693	2.58917610448622
evm.TU.contig_1154.306	no hits & (original description: none)	-9.2140452408357	-3.114968450852
evm.TU.contig_415.19	protein kinase (MAPKK)	1.50502291606798	1.88994264381879
evm.TU.contig_789.179	no hits & (original description: none)	3.6638089767258	3.62229089182706

## Sheet: DEGS (sh, inoc) in Trm & Ven
Common DEGs in 'Triumph' and 'Vendevil' compared to 'Classic'
P. sativum genome ID	Annotation	Vendevil_logFC	Triumph_logFC
evm.TU.contig_1144.102	no hits & (original description: none)	3.33751057731554	1.49582781748899
evm.TU.contig_1144.103	no hits & (original description: none)	3.25082009998171	1.71247501921754
evm.TU.contig_1144.110	no hits & (original description: none)	3.27519020475434	1.4769822677598
evm.TU.contig_1144.115	no hits & (original description: none)	1.75190509748056	2.3839592480934
evm.TU.contig_1144.119	no hits & (original description: none)	2.51364345069721	1.57712220226158
evm.TU.contig_471.330	no hits & (original description: none)	-1.44041259633024	-2.16138091582431
evm.TU.contig_789.179	no hits & (original description: none)	2.53206889044428	2.60620385664173
evm.TU.contig_910.149	no hits & (original description: none)	-1.56504811774033	-2.17042278745033
evm.TU.scaffold_1409.1070_evm.TU.scaffold_1409.1094	Pathogenesis-related protein PR-4B OS=Nicotiana tabacum (sp|p29063|pr4b_tobac : 200.0)	2.15900896320264	2.04182886043673
evm.TU.scaffold_893.708_evm.TU.scaffold_893.712	Protein EXORDIUM OS=Arabidopsis thaliana (sp|q9zpe7|exo_arath : 382.0)	-3.1744867089536	-1.98225624201993
evm.TU.scaffold_893.714	Protein EXORDIUM OS=Arabidopsis thaliana (sp|q9zpe7|exo_arath : 387.0)	-2.62218459221958	-2.30751216817245
