# Supplementary material for: Genomic and Transcriptomic Analysis of Pea (Pisum sativum L.) Breeding Line ‘Triumph’ with High Symbiotic Responsivity
Source: Preprints.org preprint supplement (doi:10.20944/preprints202311.1031.v1), 2023-11-15

# Venn diagram demonstrating transcriptomic differences between Triumph+Vendevil compared Classic Inoculation

Control

Inoculation

Roots

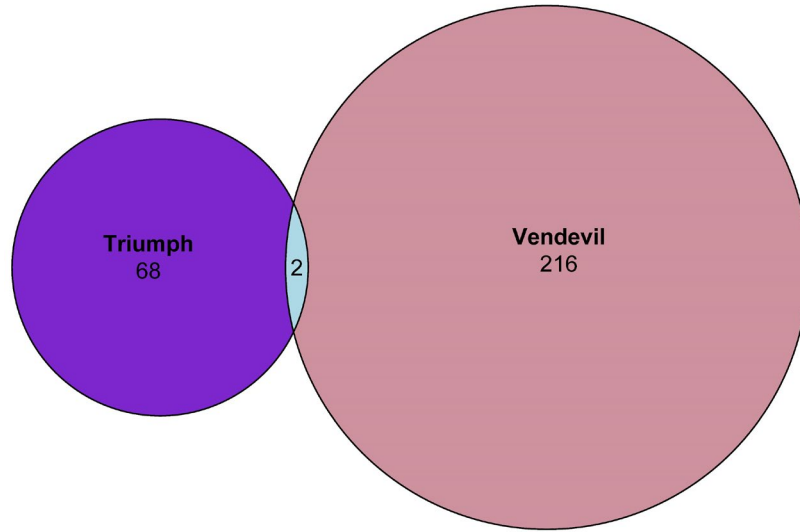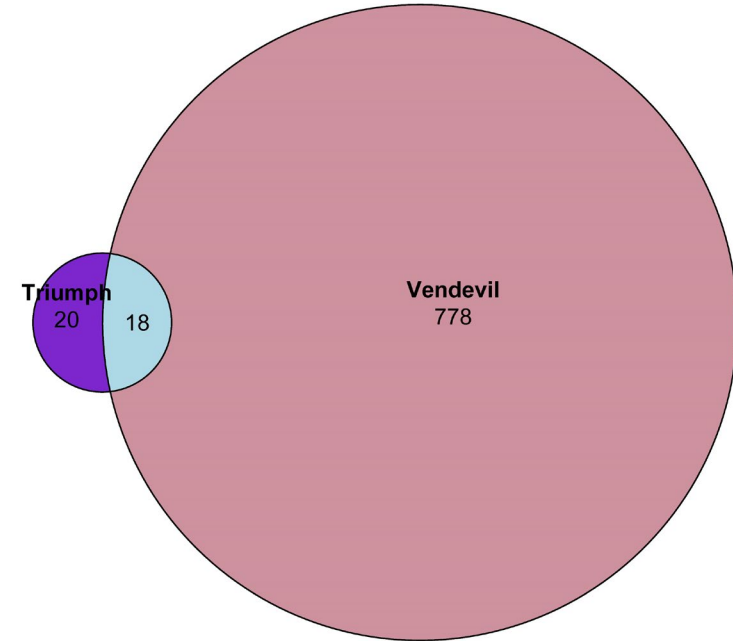

Shoots

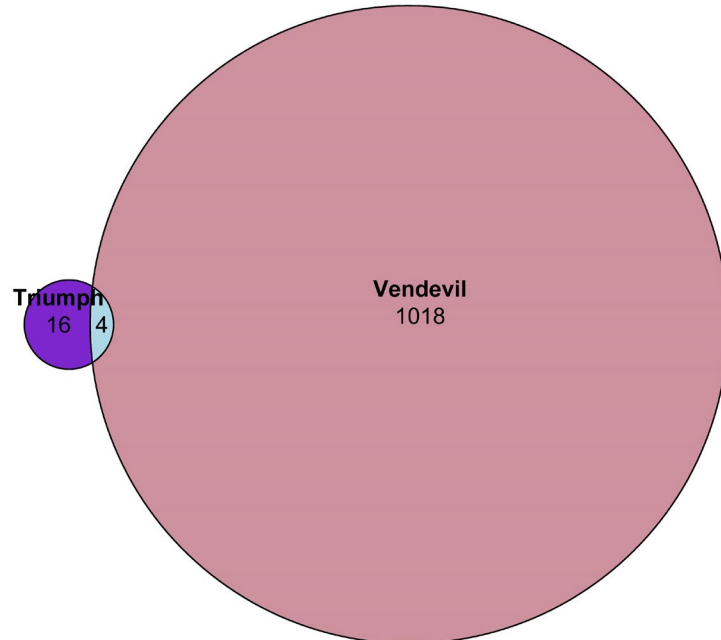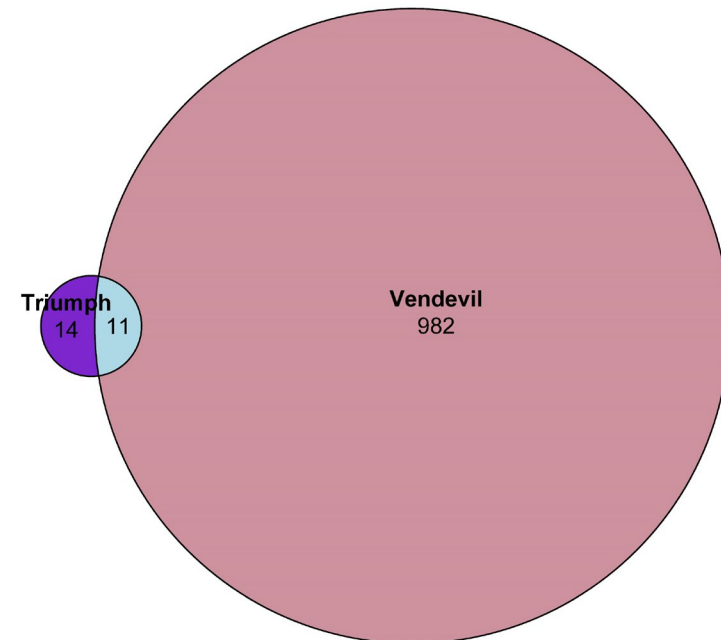

Supplement: Supplementary file 2 [file supplementary]
