# Supplementary material for: Genomic and Transcriptomic Analysis of Pea (Pisum sativum L.) Breeding Line ‘Triumph’ with High Symbiotic Responsivity
Source: Preprints.org preprint supplement (doi:10.20944/preprints202311.1031.v1), 2023-11-15
Supplement: Supplementary file 2 [file Table_S1.xlsx]

## Sheet: Reads processing description
Reads processing description
Line	# of Bases	Number of reads, mln	Aligned %	Length, bp
Classic	134.9G	446780773	91.3	151
Vendevil	190.2G	629770859	93.5	151
Triumph	169.5G	561238179	92.1	151
