# Supplementary material for: Genomic and Transcriptomic Analysis of Pea (Pisum sativum L.) Breeding Line ‘Triumph’ with High Symbiotic Responsivity
Source: Preprints.org preprint supplement (doi:10.20944/preprints202311.1031.v1), 2023-11-15

# A phylogenetic tree constructed based on the alignment of the sequence of genes encoding germin-like proteins and rhicadhesin receptors in *P. sativum* and *M. truncatula*.

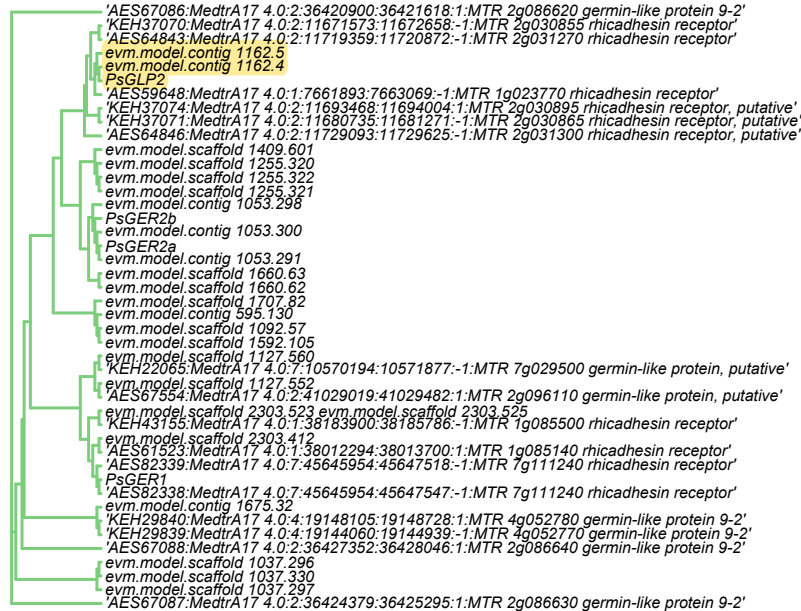

Supplement: Supplementary file 3 [file supplementary]
