# Supplementary material for: Genomic and Transcriptomic Analysis of Pea (Pisum sativum L.) Breeding Line ‘Triumph’ with High Symbiotic Responsivity
Source: Preprints.org preprint supplement (doi:10.20944/preprints202311.1031.v1), 2023-11-15
Supplement: Supplementary file 3 [file Table_S2.xlsx]

## Sheet: Supplementary_Table_S2
Common up-regulated DEGs in 'Classic', 'Triumph' and 'Vendevil'
BIN	Pathway	pea_id	annotation	mtr_id	description
'11.2.3.1'	'Phytohormone action.auxin.conjugation and degradation.indole-3-acetic acid-amido synthetase'	evm.TU.scaffold_649.120	'indole-3-acetic acid-amido synthetase'	AES94611	MTR_5g016320 gene_biotype:protein_coding transcript_biotype:protein_coding description:indole-3-acetic acid-amido synthetase
'15.5.12'	'RNA biosynthesis.transcriptional regulation.transcription factor (GRAS)'	evm.TU.contig_193.144	'transcription factor (GRAS)'	AES67303	MTR_2g089100 gene_biotype:protein_coding transcript_biotype:protein_coding description:GRAS family transcription factor
'16.4.1.4.5'	'RNA processing.pre-mRNA splicing.U2-type-intron-specific major spliceosome.U5 small nuclear ribonucleoprotein particle (snRNP).protein factor (PRPF6/PRP1/STA1)'	evm.TU.scaffold_1292.94	'protein factor PRPF6/PRP1/STA1 of U5 small nuclear ribonucleoprotein particle (snRNP)'	AES58956	MTR_1g011710 gene_biotype:protein_coding transcript_biotype:protein_coding description:pre-mRNA splicing factor-like protein
'23.1.3.5.1'	'Protein translocation.chloroplast.inner envelope TIC translocation system.redox regulon complex.component Tic32'	evm.TU.contig_1492.76	'component Tic32 of inner envelope TIC translocation system'	KEH26386	MTR_6g053550 gene_biotype:protein_coding transcript_biotype:protein_coding description:NAD(P)-binding rossmann-fold protein
'24.1.3.1.1'	'Solute transport.primary active transport.ABC superfamily.ABC1 family.subfamily ABCB transporter'	evm.TU.contig_322.253	'subfamily ABCB transporter'	AES89882	MTR_4g081190 gene_biotype:protein_coding transcript_biotype:protein_coding description:ABC transporter B family protein
'24.2.2.6'	'Solute transport.carrier-mediated transport.MFS superfamily.phosphate transporter (PHT1)'	evm.TU.contig_163.48	'phosphate transporter (PHT1)'	AES98403	MTR_5g068140 gene_biotype:protein_coding transcript_biotype:protein_coding description:phosphate transporter
'24.2.2.9'	'Solute transport.carrier-mediated transport.MFS superfamily.anion transporter (NRT1/PTR)'	evm.TU.scaffold_1858.21	'anion transporter (NRT1/PTR)'	AES81553	MTR_7g098040 gene_biotype:protein_coding transcript_biotype:protein_coding description:peptide transporter
'24.2.2.9'	'Solute transport.carrier-mediated transport.MFS superfamily.anion transporter (NRT1/PTR)'	evm.TU.contig_496.12	'anion transporter (NRT1/PTR)'	AET04348	MTR_8g087810 gene_biotype:protein_coding transcript_biotype:protein_coding description:peptide/nitrate transporter
'24.2.3.4.2'	'Solute transport.carrier-mediated transport.APC superfamily.AAAP family.amino acid transporter (LHT)'	evm.TU.scaffold_1737.44	'amino acid transporter (LHT)'	AES68006	MTR_2g101920 gene_biotype:protein_coding transcript_biotype:protein_coding description:transmembrane amino acid transporter family protein
'24.3.1.1'	'Solute transport.channels.MIP family.Nodulin-26-like intrinsic protein (NIP)'	evm.TU.contig_496.24	'Nodulin-26-like intrinsic protein (NIP)'	AET04338	MTR_8g087710 gene_biotype:protein_coding transcript_biotype:protein_coding description:major intrinsic protein (MIP) family transporter
'24.3.4.2'	'Solute transport.channels.AMT family.ammonium transporter (AMT2/3)'	evm.TU.contig_475.330	'ammonium transporter (AMT2/3)'	KEH40853	MTR_1g036410 gene_biotype:protein_coding transcript_biotype:protein_coding description:ammonium transporter 1 protein
'25.3.2.1'	'Nutrient uptake.phosphorus assimilation.phosphate uptake.phosphate transporter (PHT1)'	evm.TU.contig_163.48	'phosphate transporter (PHT1)'	AES98403	MTR_5g068140 gene_biotype:protein_coding transcript_biotype:protein_coding description:phosphate transporter
'26.9.4.1'	'External stimuli response.symbiont.solute transport.lipid transporter (STR)'	evm.TU.contig_1178.41	'lipid transporter (STR)'	AES95907	MTR_5g030910 gene_biotype:protein_coding transcript_biotype:protein_coding description:white-brown-complex ABC transporter family protein
'35.1'	'not assigned.annotated'	evm.TU.contig_438.28	'Mavicyanin OS=Cucurbita pepo (sp|p80728|mavi_cucpe : 84.3)'	AES80886	MTR_7g086200 gene_biotype:protein_coding transcript_biotype:protein_coding description:plastocyanin-like domain protein
'35.1'	'not assigned.annotated'	evm.TU.scaffold_1037.330	'Germin-like protein 9-3 OS=Oryza sativa subsp. japonica (sp|q652p9|gl93_orysj : 200.0)'	AES67088	MTR_2g086640 gene_biotype:protein_coding transcript_biotype:protein_coding description:germin-like protein 9-2
'35.1'	'not assigned.annotated'	evm.TU.contig_1178.5	'Agglutinin-2 OS=Cladrastis kentukea (sp|q39529|lec2_clake : 194.0)'	AES95928	MTR_5g031160 gene_biotype:protein_coding transcript_biotype:protein_coding description:legume lectin beta domain protein
'35.1'	'not assigned.annotated'	evm.TU.contig_1178.7	'Agglutinin-2 OS=Cladrastis kentukea (sp|q39529|lec2_clake : 187.0)'	AES95924	MTR_5g031090 gene_biotype:protein_coding transcript_biotype:protein_coding description:legume lectin family protein
'35.1'	'not assigned.annotated'	evm.TU.scaffold_1050.235	'Agglutinin-2 OS=Cladrastis kentukea (sp|q39529|lec2_clake : 182.0)'	AET03347	MTR_8g068040 gene_biotype:protein_coding transcript_biotype:protein_coding description:legume lectin beta domain protein
'35.1'	'not assigned.annotated'	evm.TU.contig_18.277	'no description available(sp|a0a1d6gnr3|kwl1_maize : 164.0)'	KEH18880	MTR_8g031170 gene_biotype:protein_coding transcript_biotype:protein_coding description:Ripening related protein family
'35.1'	'not assigned.annotated'	evm.TU.contig_1675.32	'Germin-like protein 9-3 OS=Oryza sativa subsp. japonica (sp|q652p9|gl93_orysj : 176.0)'	KEH29839	MTR_4g052770 gene_biotype:protein_coding transcript_biotype:protein_coding description:germin-like protein 9-2
'35.1'	'not assigned.annotated'	evm.TU.scaffold_1409.1096	'Pathogenesis-related protein PR-4B OS=Nicotiana tabacum (sp|p29063|pr4b_tobac : 186.0)'	KEH43011	MTR_1g080800 gene_biotype:protein_coding transcript_biotype:protein_coding description:Chitinase / Hevein / PR-4 / Wheatwin2
'35.1'	'not assigned.annotated'	evm.TU.contig_940.17	'Subtilisin-like protease SBT1.7 OS=Arabidopsis thaliana (sp|o65351|sbt17_arath : 563.0)'	AES94149	MTR_5g011270 gene_biotype:protein_coding transcript_biotype:protein_coding description:subtilisin-like serine protease
'35.1'	'not assigned.annotated'	evm.TU.scaffold_232.221	'S-norcoclaurine synthase 2 OS=Papaver somniferum (sp|q4qtj1|ncs2_papso : 114.0)'	KEH30673	MTR_4g478140 gene_biotype:protein_coding transcript_biotype:protein_coding description:S-norcoclaurine synthase-like protein
'35.1'	'not assigned.annotated'	evm.TU.contig_484.302	'Uclacyanin 1 OS=Arabidopsis thaliana (sp|o82081|ucc1_arath : 91.7)'	AES80878	MTR_7g086100 gene_biotype:protein_coding transcript_biotype:protein_coding description:plastocyanin-like domain protein
'35.1'	'not assigned.annotated'	evm.TU.contig_1624.98	'Subtilisin-like protease SBT1.2 OS=Arabidopsis thaliana (sp|o64495|sbt12_arath : 552.0)'	AES94154	MTR_5g011320 gene_biotype:protein_coding transcript_biotype:protein_coding description:subtilisin-like serine protease
'35.1'	'not assigned.annotated'	evm.TU.contig_1429.39	'GDSL esterase/lipase At5g33370 OS=Arabidopsis thaliana (sp|q8lb81|gdl79_arath : 219.0)'	AET03683	MTR_8g074570 gene_biotype:protein_coding transcript_biotype:protein_coding description:GDSL-like lipase/acylhydrolase
'35.1'	'not assigned.annotated'	evm.TU.scaffold_1691.1036	'Putative ripening-related protein 2 OS=Oryza sativa subsp. japonica (sp|q6h5x0|rip2_orysj : 169.0)'	AES87878	MTR_4g036300 gene_biotype:protein_coding transcript_biotype:protein_coding description:Ripening related protein family
'35.1'	'not assigned.annotated'	evm.TU.scaffold_1691.1031	'Putative ripening-related protein 2 OS=Oryza sativa subsp. japonica (sp|q6h5x0|rip2_orysj : 174.0)'	AES80115	MTR_7g076770 gene_biotype:protein_coding transcript_biotype:protein_coding description:Ripening related protein family
'35.1'	'not assigned.annotated'	evm.TU.contig_2116.4	'Subtilisin inhibitor 1 OS=Phaseolus angularis (sp|p16064|ici1_phaan : 92.8)'	AES69036	MTR_3g020930 gene_biotype:protein_coding transcript_biotype:protein_coding description:Nodule Cysteine-Rich (NCR) secreted peptide
'35.1'	'not assigned.annotated'	evm.TU.scaffold_1852.282	'Acidic endochitinase OS=Phaseolus angularis (sp|p29024|chia_phaan : 346.0)'	KEH17283	MTR_0027s0260 gene_biotype:protein_coding transcript_biotype:protein_coding description:chitinase
'35.1'	'not assigned.annotated'	evm.TU.scaffold_1852.306	'Acidic endochitinase OS=Phaseolus angularis (sp|p29024|chia_phaan : 341.0)'	KEH17283	MTR_0027s0260 gene_biotype:protein_coding transcript_biotype:protein_coding description:chitinase
'35.1'	'not assigned.annotated'	evm.TU.scaffold_1852.280	'Acidic endochitinase OS=Nicotiana tabacum (sp|p29060|chia_tobac : 339.0)'	KEH17283	MTR_0027s0260 gene_biotype:protein_coding transcript_biotype:protein_coding description:chitinase
'35.2'	'not assigned.not annotated'	evm.TU.contig_1827.31	' no hits & (original description: none)'	KEH20300	MTR_8g071050 gene_biotype:protein_coding transcript_biotype:protein_coding description:transmembrane protein, putative
'35.2'	'not assigned.not annotated'	evm.TU.contig_699.47	' no hits & (original description: none)'	AES98991	MTR_5g075400 gene_biotype:protein_coding transcript_biotype:protein_coding description:hypothetical protein
'35.2'	'not assigned.not annotated'	evm.TU.scaffold_1753.155	' no hits & (original description: none)'	AES97109	MTR_5g045470 gene_biotype:protein_coding transcript_biotype:protein_coding description:inhibitor of trypsin and hageman factor-like protein
'35.2'	'not assigned.not annotated'	evm.TU.contig_1441.5	' no hits & (original description: none)'	AES99001	MTR_5g075520 gene_biotype:protein_coding transcript_biotype:protein_coding description:hypothetical protein
'35.2'	'not assigned.not annotated'	evm.TU.contig_460.15	' no hits & (original description: none)'	AES89499	MTR_4g076150 gene_biotype:protein_coding transcript_biotype:protein_coding description:Lipid transfer protein
'35.2'	'not assigned.not annotated'	evm.TU.scaffold_1535.965	' no hits & (original description: none)'	NA	NA
'35.2'	'not assigned.not annotated'	evm.TU.contig_954.3	' no hits & (original description: none)'	AES63745	MTR_2g012790 gene_biotype:protein_coding transcript_biotype:protein_coding description:F-box/kelch-repeat plant protein, putative
'50.1.13'	'Enzyme classification.EC_1 oxidoreductases.EC_1.14 oxidoreductase acting on paired donor with incorporation or reduction of molecular oxygen'	evm.TU.contig_145.649	'Probable 2-oxoglutarate-dependent dioxygenase At5g05600 OS=Arabidopsis thaliana (sp|q9fff6|diox5_arath : 175.0) & Enzyme classification.EC_1 oxidoreductases.EC_1.14 oxidoreductase acting on paired donor with incorporation or reduction of molecular oxygen(50.1.13 : 144.0)'	NA	NA
'50.1.13'	'Enzyme classification.EC_1 oxidoreductases.EC_1.14 oxidoreductase acting on paired donor with incorporation or reduction of molecular oxygen'	evm.TU.contig_464.240	'Enzyme classification.EC_1 oxidoreductases.EC_1.14 oxidoreductase acting on paired donor with incorporation or reduction of molecular oxygen(50.1.13 : 322.1) & Abscisic acid 8'-hydroxylase 3 OS=Arabidopsis thaliana (sp|q9fh76|abah3_arath : 293.0)'	KEH25831	MTR_6g034940 gene_biotype:protein_coding transcript_biotype:protein_coding description:cytochrome P450 family protein
'50.1.13'	'Enzyme classification.EC_1 oxidoreductases.EC_1.14 oxidoreductase acting on paired donor with incorporation or reduction of molecular oxygen'	evm.TU.contig_148.14	'Hyoscyamine 6-dioxygenase OS=Hyoscyamus niger (sp|p24397|hy6h_hyoni : 265.0) & Enzyme classification.EC_1 oxidoreductases.EC_1.14 oxidoreductase acting on paired donor with incorporation or reduction of molecular oxygen(50.1.13 : 160.2)'	KEH25146	MTR_6g015950 gene_biotype:protein_coding transcript_biotype:protein_coding description:2OG-Fe(II) oxygenase family oxidoreductase
'50.1.13'	'Enzyme classification.EC_1 oxidoreductases.EC_1.14 oxidoreductase acting on paired donor with incorporation or reduction of molecular oxygen'	evm.TU.contig_888.29	'Premnaspirodiene oxygenase OS=Hyoscyamus muticus (sp|a6yih8|c7d55_hyomu : 509.0) & Enzyme classification.EC_1 oxidoreductases.EC_1.14 oxidoreductase acting on paired donor with incorporation or reduction of molecular oxygen(50.1.13 : 377.8)'	AET00690	MTR_5g094840 gene_biotype:protein_coding transcript_biotype:protein_coding description:cytochrome P450 family 71 protein
'50.2.7'	'Enzyme classification.EC_2 transferases.EC_2.7 transferase transferring phosphorus-containing group'	evm.TU.scaffold_1882.10	'Enzyme classification.EC_2 transferases.EC_2.7 transferase transferring phosphorus-containing group(50.2.7 : 308.1) & Proline-rich receptor-like protein kinase PERK8 OS=Arabidopsis thaliana (sp|q9ffw5|perk8_arath : 212.0)'	KEH16379	MTR_0205s0040 gene_biotype:protein_coding transcript_biotype:protein_coding description:dual-specificity kinase domain protein
