# Supplementary material for: Genomic and Transcriptomic Analysis of Pea (Pisum sativum L.) Breeding Line ‘Triumph’ with High Symbiotic Responsivity
Source: Preprints.org preprint supplement (doi:10.20944/preprints202311.1031.v1), 2023-11-15
Supplement: Supplementary file 4 [file Table_S3.xlsx]

## Sheet: DEGs (down-reg Cls)
Down-regulated DEGs in response to double inoculation
log2FoldChange	padj	gene_id	function.
-1.04752874649773	0.0285467899989266	evm.TU.scaffold_2720.260_evm.TU.scaffold_2720.267	Disease resistance response protein Pi49 OS=Pisum sativum (sp|p14710|drr3_pea : 273.0)
-1.218182275286	0.0199515175637012	evm.TU.scaffold_1106.322	thiamine diphosphokinase
-1.1414634943573	0.0322009852017752	evm.TU.scaffold_1124.139	phenylalanine ammonia lyase (PAL)
-1.96552996873888	0.000560140874193863	evm.TU.contig_349.275	no hits & (original description: none)
-1.02833096709264	0.0172683034977071	evm.TU.scaffold_374.175	P3A-type proton-translocating ATPase (AHA)
-1.13806152147963	0.038946374297443	evm.TU.contig_1542.1	Indole-3-acetic acid-amido synthetase GH3.6 OS=Arabidopsis thaliana (sp|q9lsq4|gh36_arath : 1018.0)
-2.35752641681372	0.0153336151208907	evm.TU.contig_1120.265	Stem-specific protein TSJT1 OS=Nicotiana tabacum (sp|p24805|tsjt1_tobac : 117.0)
-1.38884364911285	0.0335707101255593	evm.TU.scaffold_756.210	Unknown seed protein USP OS=Vicia faba (sp|q43675|usp_vicfa : 200.0)
-5.35898542282712	0.037988052036621	evm.TU.scaffold_1691.705	no hits & (original description: none)
-6.9008376460803	0.00306106019754429	evm.TU.contig_1560.2	no hits & (original description: none)
-1.55645545517826	0.00169683948674217	evm.TU.scaffold_1169.406	tonoplast intrinsic protein (TIP)

## Sheet: DEGs (down-reg, Trm)
Down-regulated DEGs in response to double inoculation
log2FoldChange	padj	gene_id	function.
-2.97082198109552	0.00528944622281125	evm.TU.scaffold_2664.9	MLP-like protein 43 OS=Arabidopsis thaliana (sp|q9ssk5|mlp43_arath : 108.0)
-2.00503333864836	0.0479694765400221	evm.TU.scaffold_1022.146	6-phosphogluconolactonase
-1.19250250632182	0.021649814298517	evm.TU.scaffold_443.312	Probable xyloglucan endotransglucosylase/hydrolase protein 23 OS=Arabidopsis thaliana (sp|q38910|xth23_arath : 389.0) & Enzyme classification.EC_2 transferases.EC_2.4 glycosyltransferase(50.2.4 : 318.7)
-1.56130400253886	0.0430607293519589	evm.TU.contig_1631.12	mRNA-binding regulatory factor (TZF)

## Sheet: DEGs (down-reg, Ven)
Down-regulated DEGs in response to double inoculation
log2FoldChange	padj	gene_id	function.
-1.26591514787982	0.0042791135404775	evm.TU.scaffold_423.806	Leghemoglobin 29 OS=Vicia faba (sp|p93848|lgb2_vicfa : 231.0)
-1.3775160986683	0.0317760228913509	evm.TU.scaffold_6316.71	RING-H2-class E3 ligase
-1.78572310226997	0.0289568294368867	evm.TU.scaffold_844.291	Molybdate transporter 1 OS=Arabidopsis thaliana (sp|q9sl95|mot1_arath : 95.9)
-3.09798045849292	0.0366119996958918	evm.TU.scaffold_1721.307	no hits & (original description: none)
-1.15199442043016	0.0205467801974461	evm.TU.contig_1101.4	molybdate transporter (MOT)
-1.07819758704947	0.0319586855967375	evm.TU.contig_1597.123	Disease resistance protein At4g27190 OS=Arabidopsis thaliana (sp|q9t048|drl27_arath : 239.0)
-1.36975116085083	0.0358985586449721	evm.TU.scaffold_1858.17	anion transporter (NRT1/PTR)
-1.35779654168313	0.000499258533680071	evm.TU.scaffold_1544.34	Enzyme classification.EC_1 oxidoreductases.EC_1.3 oxidoreductase acting on CH-CH group of donor(50.1.3 : 657.5) & 12-oxophytodienoate reductase 1 OS=Solanum lycopersicum (sp|q9xg54|opr1_sollc : 550.0)
-2.31030527007421	0.0246706328577485	novel_gene_91_60176bf8	no hits & (original description: none)
-1.11443809507321	0.000811594037338257	evm.TU.scaffold_374.103	Peroxidase 45 OS=Arabidopsis thaliana (sp|q96522|per45_arath : 269.0)
-1.82659809020711	0.0116872710057189	evm.TU.contig_706.7	myo-inositol oxygenase
-1.08048729158959	0.0105315084818855	evm.TU.contig_801.31	no hits & (original description: none)
-1.81908602938073	0.0205467801974461	novel_gene_777_60176bf8	no hits & (original description: none)
-1.3344627936645	0.0125975380893951	evm.TU.contig_789.50	Basic blue protein OS=Arabidopsis thaliana (sp|q8lg89|babl_arath : 134.0)
-1.32253672465232	0.00231779998898779	evm.TU.scaffold_569.512	cytosolic fructose-bisphosphate aldolase
-2.03561419769325	0.00382950955562027	evm.TU.scaffold_1646.330	abscisic acid hydroxylase
-1.22778719685204	0.0041031579406462	evm.TU.scaffold_3991.15	Leghemoglobin Lb120-34 OS=Pisum sativum (sp|q9saz0|lgb6_pea : 262.0)
-1.19879680220706	0.0205467801974461	evm.TU.scaffold_3991.11	Leghemoglobin Lb120-29 OS=Pisum sativum (sp|o48665|lgb5_pea : 256.0)
-1.19539476772099	0.00883604387047387	evm.TU.scaffold_3991.16	Leghemoglobin Lb120-1 OS=Pisum sativum (sp|o80405|lgb3_pea : 262.0)
-1.27461923494415	0.0028924631651043	evm.TU.scaffold_3991.14	Leghemoglobin Lb120-8 OS=Pisum sativum (sp|q9saz1|lgb4_pea : 191.0)
-1.17978965531999	0.0111156126653725	evm.TU.scaffold_3991.17	Leghemoglobin Lb120-1 OS=Pisum sativum (sp|o80405|lgb3_pea : 185.0)
-1.27254983892067	0.000715529956077306	evm.TU.contig_1670.1	no hits & (original description: none)
-2.27916636107319	0.0460070516834939	novel_gene_56_60176bf8	RNA-directed DNA polymerase homolog OS=Oenothera berteroana (sp|p31843|rrpo_oenbe : 83.2)
