# Supplementary material for: Genomic and Transcriptomic Analysis of Pea (Pisum sativum L.) Breeding Line ‘Triumph’ with High Symbiotic Responsivity
Source: Preprints.org preprint supplement (doi:10.20944/preprints202311.1031.v1), 2023-11-15
Supplement: Supplementary file 5 [file Table_S4.xlsx]

## Sheet: Table_S4
Common up-regulated DEGs in respons to double inoclation in 'Triumph' and 'Vendevil'
Mercator BIN code	Pathway	P. sativum genome ID	Mercator annotation	M. truncatula genome ID and annotation
'11.2.1.1.1'	'Phytohormone action.auxin.biosynthesis.indole-3-pyruvic acid (IPyA) pathway.tryptophan aminotransferase'	evm.TU.contig_1755.59	'tryptophan aminotransferase'	MTR_5g033510 gene_biotype:protein_coding transcript_biotype:protein_coding description:tryptophan aminotransferase-like protein
'19.4.2.2'	'Protein homeostasis.proteolysis.serine-type peptidase activities.S10-class serine carboxypeptidase (SCPL)'	evm.TU.scaffold_1366.347	'serine carboxypeptidase'	MTR_3g079570 gene_biotype:protein_coding transcript_biotype:protein_coding description:serine carboxypeptidase-like protein
'24.1.2.3.1'	'Solute transport.primary active transport.P-type ATPase superfamily.P3 family.P3A-type proton-translocating ATPase (AHA)'	evm.TU.contig_1547.129	'P3A-type proton-translocating ATPase (AHA)'	MTR_8g006790 gene_biotype:protein_coding transcript_biotype:protein_coding description:plasma membrane H+-ATPase
'24.1.3.1.1'	'Solute transport.primary active transport.ABC superfamily.ABC1 family.subfamily ABCB transporter'	evm.TU.scaffold_1127.368	'subfamily ABCB transporter'	MTR_8g022270 gene_biotype:protein_coding transcript_biotype:protein_coding description:ABC transporter B family-like protein
'24.2.2.9'	'Solute transport.carrier-mediated transport.MFS superfamily.anion transporter (NRT1/PTR)'	evm.TU.scaffold_505.350	'anion transporter (NRT1/PTR)'	MTR_3g462710 gene_biotype:protein_coding transcript_biotype:protein_coding description:proton-dependent oligopeptide transport family protein
'26.9.4.1'	'External stimuli response.symbiont.solute transport.lipid transporter (STR)'	evm.TU.contig_2483.66	'lipid transporter (STR)'	MTR_8g107450 gene_biotype:protein_coding transcript_biotype:protein_coding description:white-brown-complex ABC transporter family protein
'35.1'	'not assigned.annotated'	evm.TU.scaffold_1660.29	'Peroxidase 44 OS=Arabidopsis thaliana (sp|q93v93|per44_arath : 357.0)'	MTR_7g086820 gene_biotype:protein_coding transcript_biotype:protein_coding description:peroxidase family protein
'35.1'	'not assigned.annotated'	evm.TU.contig_785.71	'MLO protein homolog 1 OS=Oryza sativa subsp. japonica (sp|q0dc45|mloh1_orysj : 548.0)'	MTR_3g115940 gene_biotype:protein_coding transcript_biotype:protein_coding description:seven transmembrane MLO family protein
'35.1'	'not assigned.annotated'	evm.TU.contig_245.126	'Subtilisin-like protease SBT5.3 OS=Arabidopsis thaliana (sp|q9zsp5|air3_arath : 458.0)'	MTR_4g053630 gene_biotype:protein_coding transcript_biotype:protein_coding description:subtilisin-like serine protease
'35.1'	'not assigned.annotated'	evm.TU.scaffold_251.348	'Subtilisin-like protease SBT1.2 OS=Arabidopsis thaliana (sp|o64495|sbt12_arath : 556.0)'	MTR_4g102400 gene_biotype:protein_coding transcript_biotype:protein_coding description:subtilisin-like serine protease
'35.1'	'not assigned.annotated'	evm.TU.contig_383.278	'Transmembrane ascorbate ferrireductase 1 OS=Arabidopsis thaliana (sp|q8l856|acfr1_arath : 153.0)'	MTR_1g033360 gene_biotype:protein_coding transcript_biotype:protein_coding description:eukaryotic cytochrome b561 protein
'35.1'	'not assigned.annotated'	evm.TU.contig_363.85	'4-coumarate--CoA ligase-like 9 OS=Oryza sativa subsp. japonica (sp|q7xxl2|4cll9_orysj : 95.1)'	MTR_2g098490 gene_biotype:protein_coding transcript_biotype:protein_coding description:AMP-binding enzyme
'35.1'	'not assigned.annotated'	evm.TU.contig_1162.5	'Putative germin-like protein 2-1 OS=Oryza sativa subsp. japonica (sp|q6k5q0|gl21_orysj : 244.0)'	MTR_2g031270 gene_biotype:protein_coding transcript_biotype:protein_coding description:rhicadhesin receptor
'35.1'	'not assigned.annotated'	evm.TU.contig_1162.4	'Putative germin-like protein 2-2 OS=Oryza sativa subsp. japonica (sp|q6k5p9|gl22_orysj : 242.0)'	MTR_2g031270 gene_biotype:protein_coding transcript_biotype:protein_coding description:rhicadhesin receptor
'35.1'	'not assigned.annotated'	evm.TU.contig_1162.3	'Putative germin-like protein 2-1 OS=Oryza sativa subsp. japonica (sp|q6k5q0|gl21_orysj : 251.0)'	MTR_1g023770 gene_biotype:protein_coding transcript_biotype:protein_coding description:rhicadhesin receptor
'35.1'	'not assigned.annotated'	evm.TU.scaffold_1691.1038	'Putative ripening-related protein 2 OS=Oryza sativa subsp. japonica (sp|q6h5x0|rip2_orysj : 169.0)'	MTR_4g036300 gene_biotype:protein_coding transcript_biotype:protein_coding description:Ripening related protein family
'35.2'	'not assigned.not annotated'	evm.TU.contig_867.74	' no hits & (original description: none)'	MTR_6g073090 gene_biotype:protein_coding transcript_biotype:protein_coding description:transmembrane protein, putative
'35.2'	'not assigned.not annotated'	evm.TU.contig_952.208	' no hits & (original description: none)'	NA
'35.2'	'not assigned.not annotated'	evm.TU.contig_145.534	' no hits & (original description: none)'	NA
'35.2'	'not assigned.not annotated'	evm.TU.contig_1105.99	' no hits & (original description: none)'	NA
'35.2'	'not assigned.not annotated'	evm.TU.contig_1547.130	' no hits & (original description: none)'	MTR_8g006785 gene_biotype:protein_coding transcript_biotype:protein_coding description:protein prenyltransferase alpha subunit repeat protein
'35.2'	'not assigned.not annotated'	evm.TU.scaffold_550.895	' no hits & (original description: none)'	MTR_4g091020 gene_biotype:protein_coding transcript_biotype:protein_coding description:LysM domain protein
'35.2'	'not assigned.not annotated'	evm.TU.scaffold_550.900	' no hits & (original description: none)'	MTR_4g091020 gene_biotype:protein_coding transcript_biotype:protein_coding description:LysM domain protein
'35.2'	'not assigned.not annotated'	evm.TU.contig_714.29	' no hits & (original description: none)'	NA
'35.2'	'not assigned.not annotated'	evm.TU.contig_1371.18	' no hits & (original description: none)'	NA
'35.2'	'not assigned.not annotated'	evm.TU.contig_1467.156	' no hits & (original description: none)'	MTR_3g093420 gene_biotype:protein_coding transcript_biotype:protein_coding description:zinc finger with UFM1-specific peptidase domain protein
'50.1.13'	'Enzyme classification.EC_1 oxidoreductases.EC_1.14 oxidoreductase acting on paired donor with incorporation or reduction of molecular oxygen'	evm.TU.contig_1346.136	'Cytochrome P450 71D11 (Fragment) OS=Lotus japonicus (sp|o22307|c71db_lotja : 718.0) & Enzyme classification.EC_1 oxidoreductases.EC_1.14 oxidoreductase acting on paired donor with incorporation or reduction of molecular oxygen(50.1.13 : 381.2)'	MTR_3g058000 gene_biotype:protein_coding transcript_biotype:protein_coding description:cytochrome P450 family 71 protein
'50.1.13'	'Enzyme classification.EC_1 oxidoreductases.EC_1.14 oxidoreductase acting on paired donor with incorporation or reduction of molecular oxygen'	evm.TU.scaffold_4115.364	'Cytochrome P450 716B1 OS=Picea sitchensis (sp|q50ek1|c16b1_picsi : 377.0) & Enzyme classification.EC_1 oxidoreductases.EC_1.14 oxidoreductase acting on paired donor with incorporation or reduction of molecular oxygen(50.1.13 : 177.1)'	MTR_5g092150 gene_biotype:protein_coding transcript_biotype:protein_coding description:cytochrome P450 family protein
'50.1.13'	'Enzyme classification.EC_1 oxidoreductases.EC_1.14 oxidoreductase acting on paired donor with incorporation or reduction of molecular oxygen'	evm.TU.scaffold_258.357	'Probable 2-oxoglutarate-dependent dioxygenase At5g05600 OS=Arabidopsis thaliana (sp|q9fff6|diox5_arath : 194.0) & Enzyme classification.EC_1 oxidoreductases.EC_1.14 oxidoreductase acting on paired donor with incorporation or reduction of molecular oxygen(50.1.13 : 131.1)'	MTR_1g034120 gene_biotype:protein_coding transcript_biotype:protein_coding description:gibberellin 2-beta-dioxygenase
'50.1.13'	'Enzyme classification.EC_1 oxidoreductases.EC_1.14 oxidoreductase acting on paired donor with incorporation or reduction of molecular oxygen'	evm.TU.contig_1154.278	'no description available(sp|q2mj19|c7a68_medtr : 733.0) & Enzyme classification.EC_1 oxidoreductases.EC_1.14 oxidoreductase acting on paired donor with incorporation or reduction of molecular oxygen(50.1.13 : 148.5)'	MTR_2g072250 gene_biotype:protein_coding transcript_biotype:protein_coding description:cytochrome P450 family 709 protein
'50.2.1'	'Enzyme classification.EC_2 transferases.EC_2.1 transferase transferring one-carbon group'	evm.TU.scaffold_1663.185	'Isoliquiritigenin 2'-O-methyltransferase OS=Medicago sativa (sp|p93324|chomt_medsa : 403.0) & Enzyme classification.EC_2 transferases.EC_2.1 transferase transferring one-carbon group(50.2.1 : 333.6)'	MTR_3g021440 gene_biotype:protein_coding transcript_biotype:protein_coding description:caffeic acid O-methyltransferase
'50.2.4'	'Enzyme classification.EC_2 transferases.EC_2.4 glycosyltransferase'	evm.TU.scaffold_341.76	'UDP-glucose flavonoid 3-O-glucosyltransferase 7 OS=Fragaria ananassa (sp|q2v6j9|ufog7_fraan : 373.0) & Enzyme classification.EC_2 transferases.EC_2.4 glycosyltransferase(50.2.4 : 179.4)'	MTR_0536s0010 gene_biotype:protein_coding transcript_biotype:protein_coding description:UDP-glucosyltransferase family protein
'50.2.4'	'Enzyme classification.EC_2 transferases.EC_2.4 glycosyltransferase'	evm.TU.scaffold_341.57	'UDP-glycosyltransferase 73B4 OS=Arabidopsis thaliana (sp|q7y232|u73b4_arath : 366.0) & Enzyme classification.EC_2 transferases.EC_2.4 glycosyltransferase(50.2.4 : 180.8)'	MTR_4g117950 gene_biotype:protein_coding transcript_biotype:protein_coding description:UDP-glucosyltransferase family protein
'50.2.4'	'Enzyme classification.EC_2 transferases.EC_2.4 glycosyltransferase'	evm.TU.scaffold_2084.193	'UDP-glycosyltransferase 73C1 OS=Arabidopsis thaliana (sp|q9zq99|u73c1_arath : 543.0) & Enzyme classification.EC_2 transferases.EC_2.4 glycosyltransferase(50.2.4 : 171.2)'	MTR_7g102460 gene_biotype:protein_coding transcript_biotype:protein_coding description:UDP-glucosyltransferase family protein
