# Supplementary material for: Genomic and Transcriptomic Analysis of Pea (Pisum sativum L.) Breeding Line ‘Triumph’ with High Symbiotic Responsivity
Source: Preprints.org preprint supplement (doi:10.20944/preprints202311.1031.v1), 2023-11-15
Supplement: Supplementary file 8 [file supplementary]

Archive with 15 entries (15 files):
- Figure_S1.pdf
- Figure_S10.pdf
- Figure_S2.pdf
- Figure_S3.pdf
- Figure_S4.jpg
- Figure_S5.jpg
- Figure_S6.jpg
- Figure_S7.pdf
- Figure_S8.pdf
- Figure_S9.pdf
- Table_S1.xlsx
- Table_S2.xlsx
- Table_S3.xlsx
- Table_S4.xlsx
- Table_S5.xlsx
