# Supplementary figures and images for: Genomic and Transcriptomic Analysis of Pea (Pisum sativum L.) Breeding Line ‘Triumph’ with High Symbiotic Responsivity
Source: Preprints.org preprint supplement (doi:10.20944/preprints202311.1031.v1), 2023-11-15

Variants distribution across genomic regions

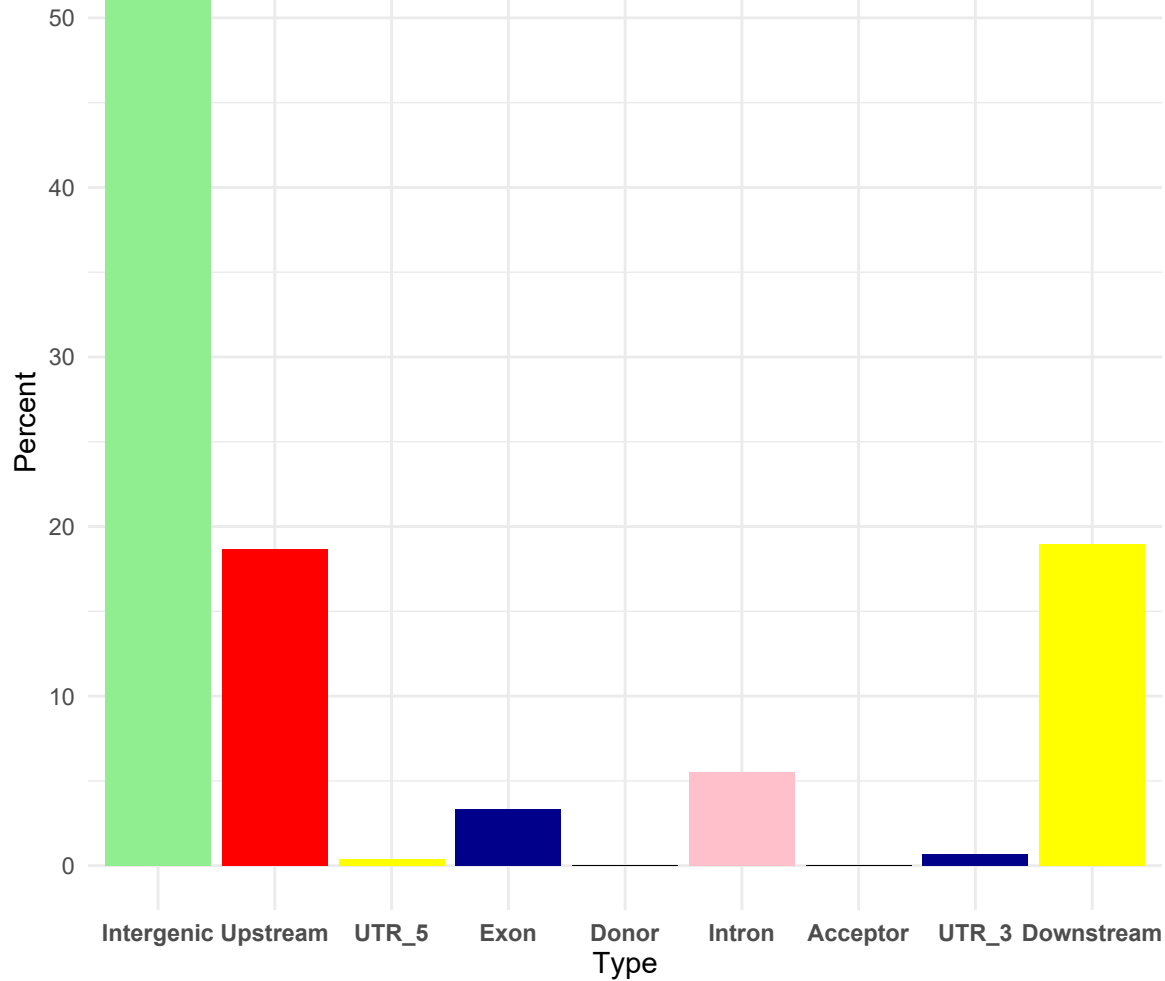

Supplement: Supplementary file 1 [file supplementary]

Expression analysis of *M. truncatula*'s homolog of *PsGLP2* obtained using MtGEA

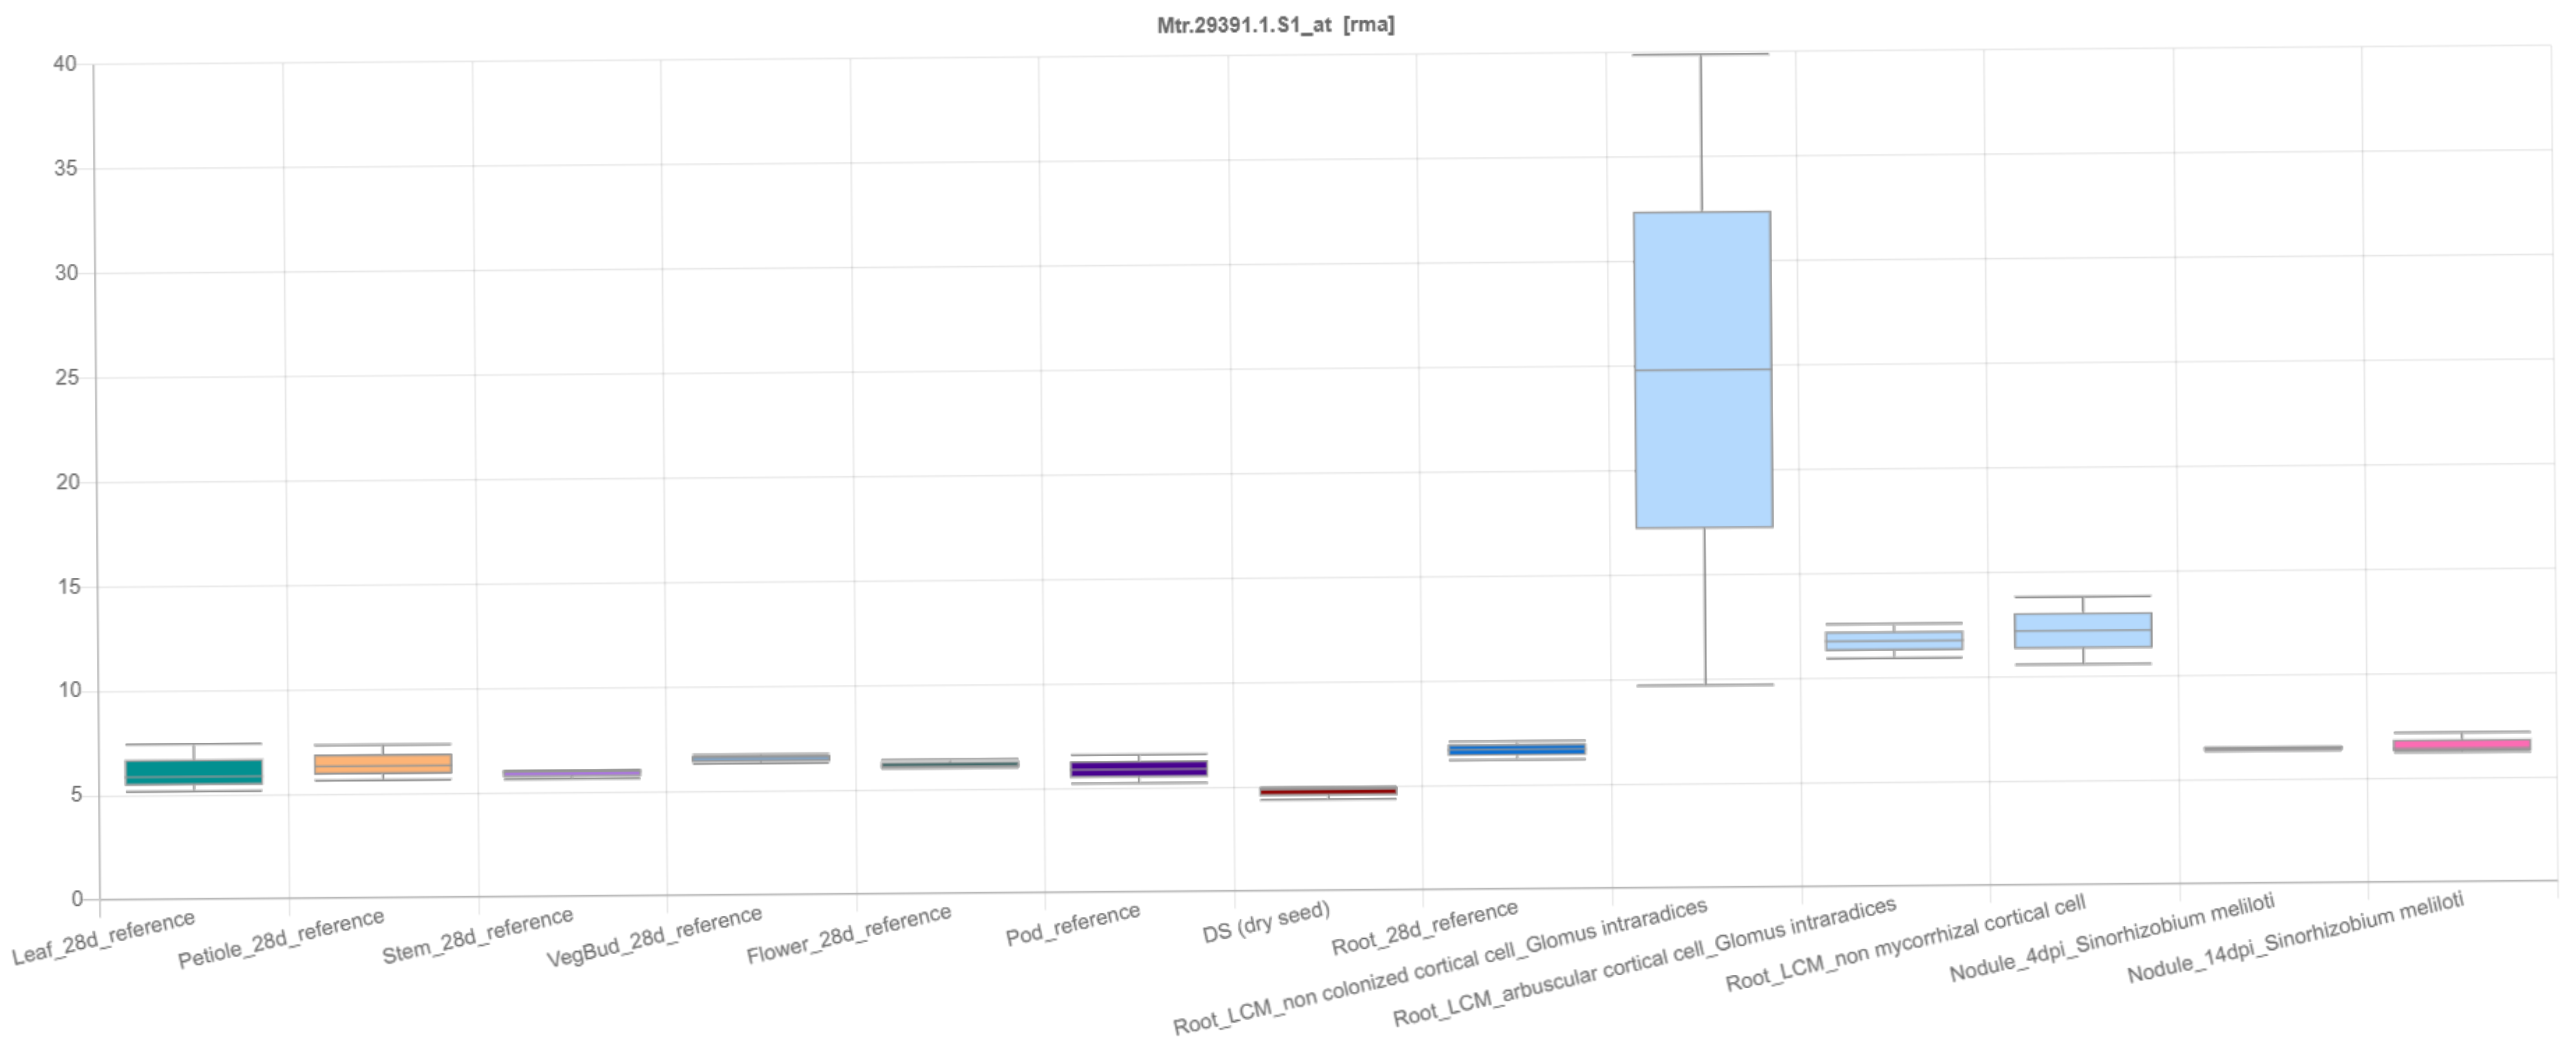

Supplement: Supplementary file 4 [file supplementary]

# PCA analysis of transcriptomic data

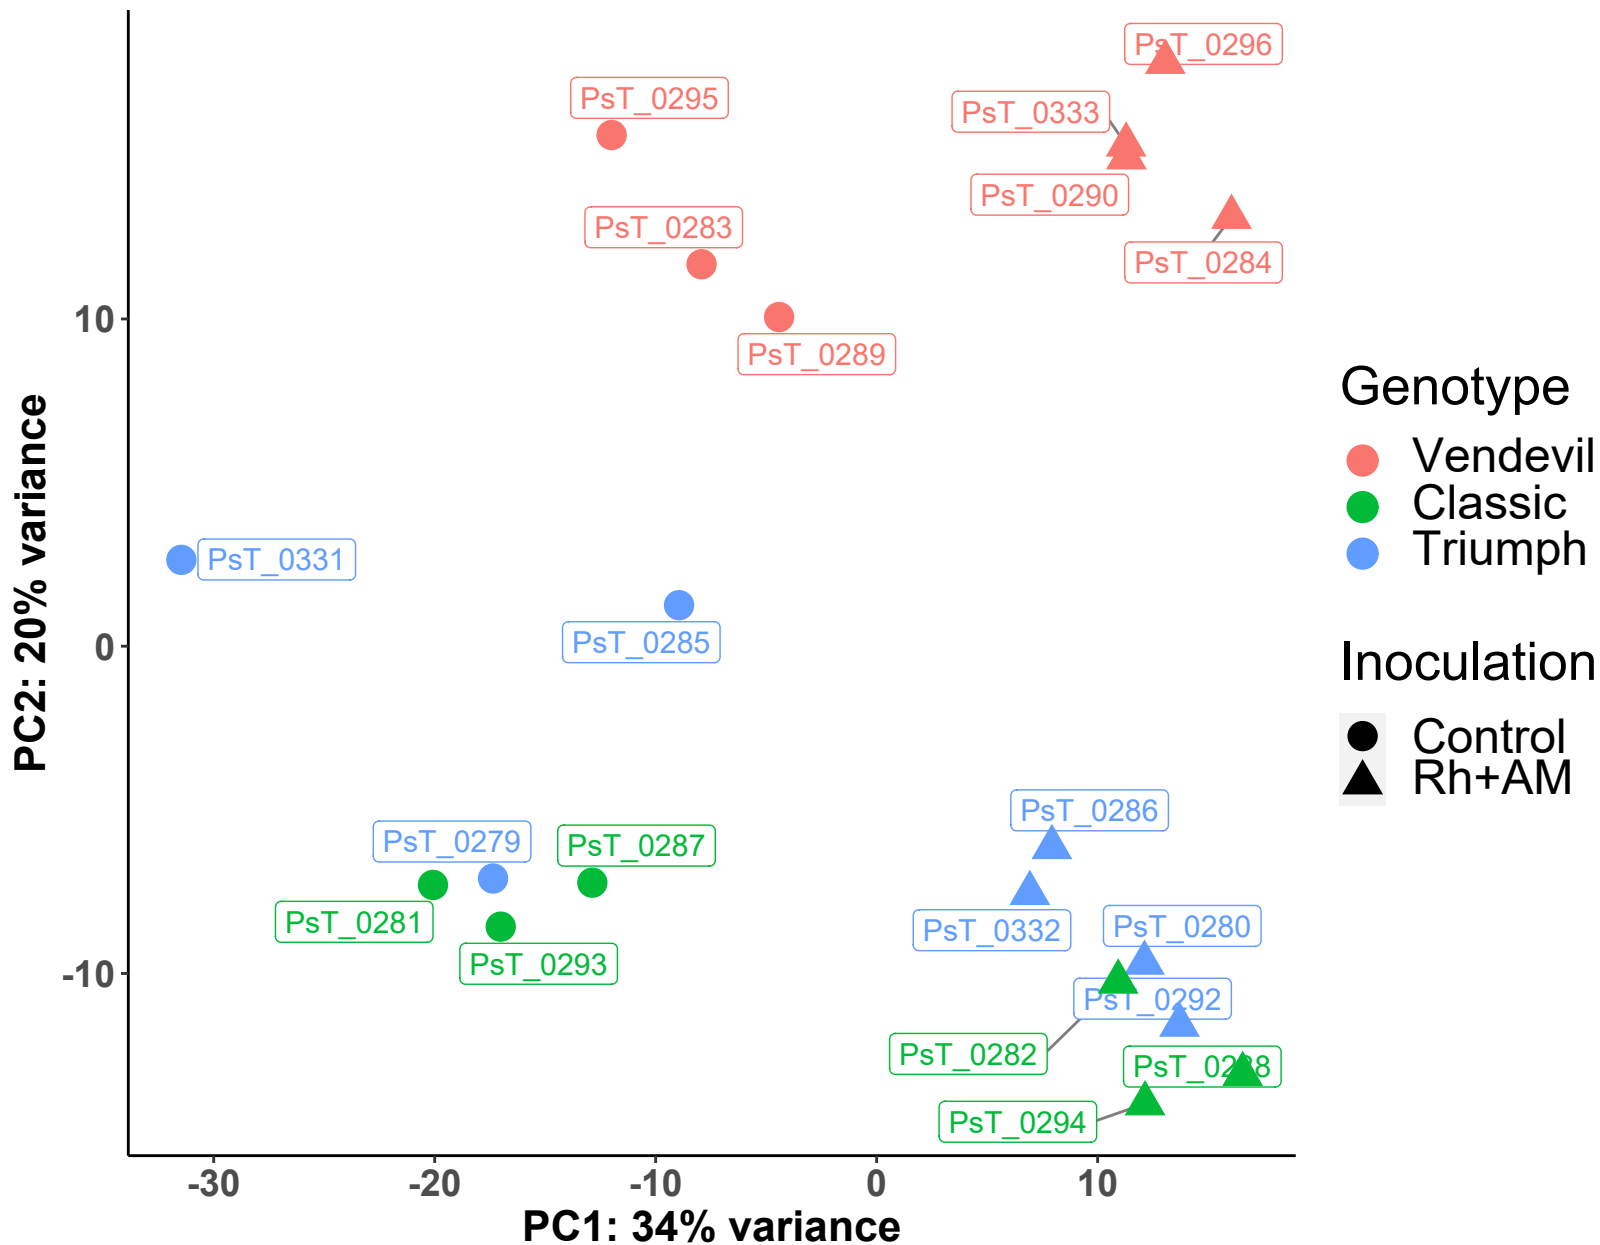

Supplement: Supplementary file 5 [file supplementary]

# GO enrichment analysis of genes with indels that are common for Triumph and Vendevil

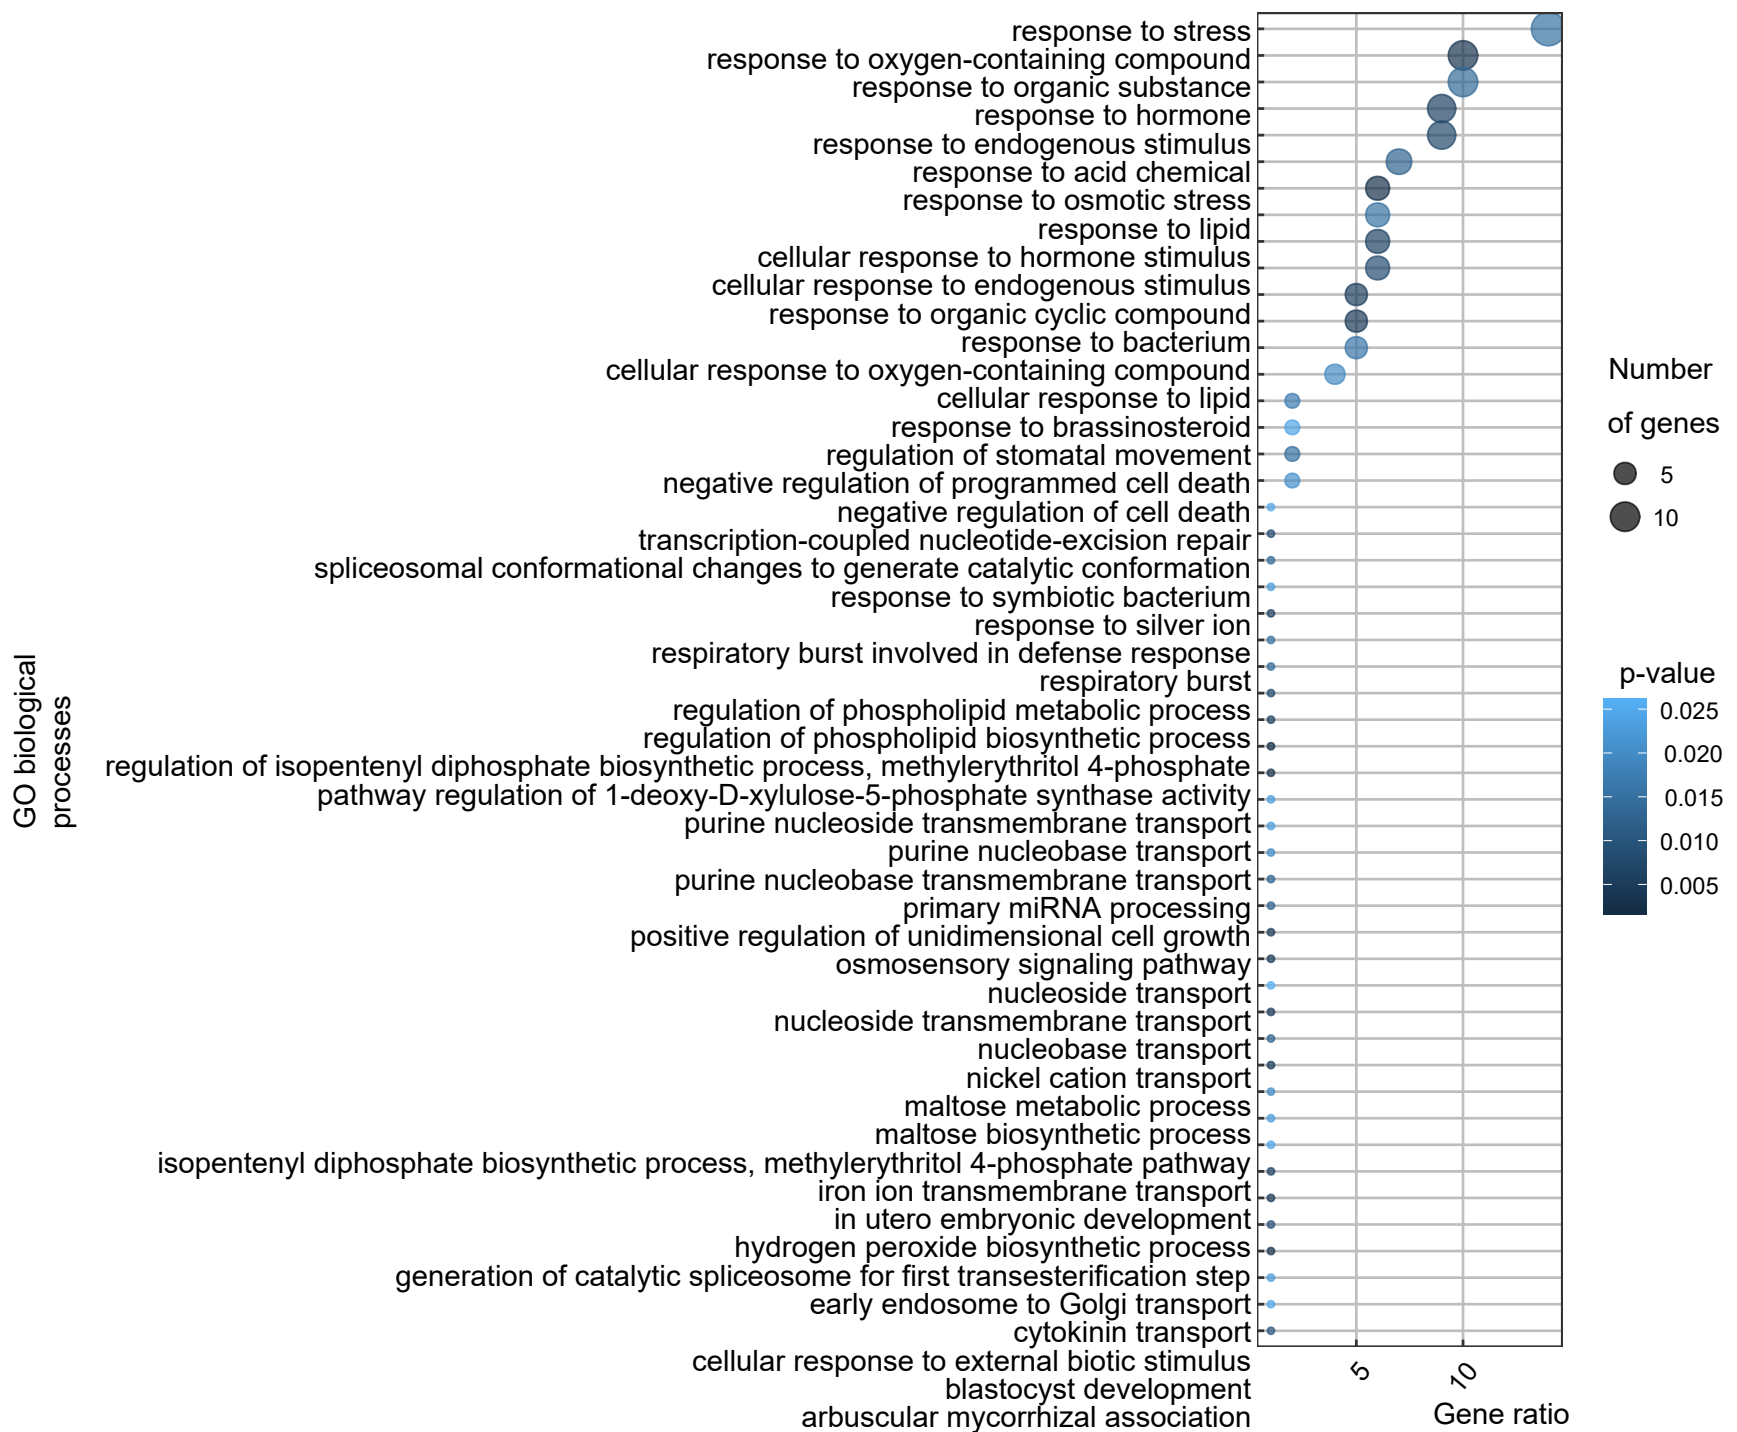

Supplement: Supplementary file 6 [file supplementary]

# Stages of variants filtering

## variants number

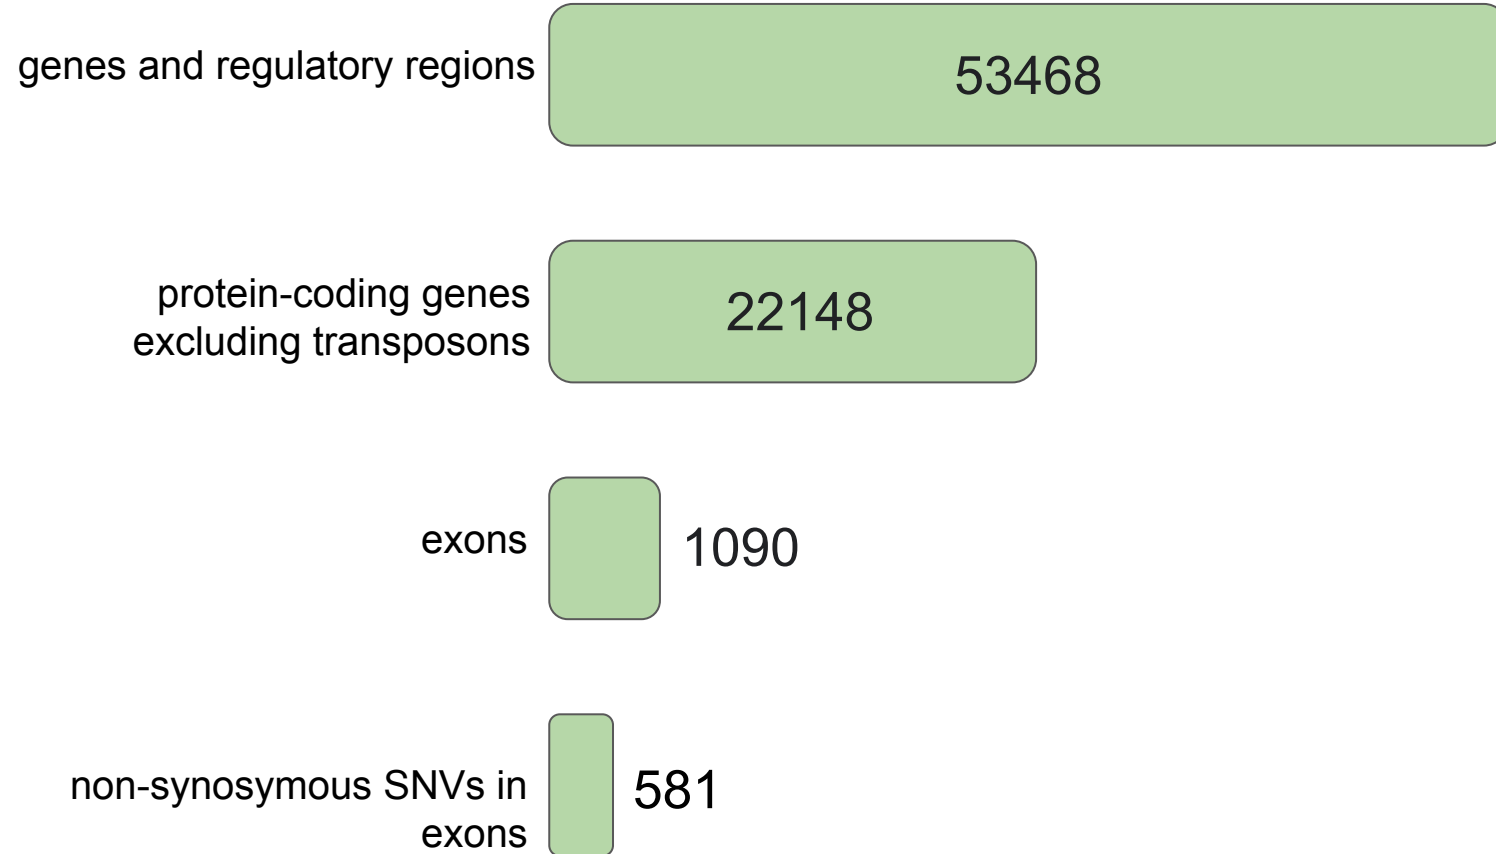

Supplement: Supplementary file 7 [file supplementary]

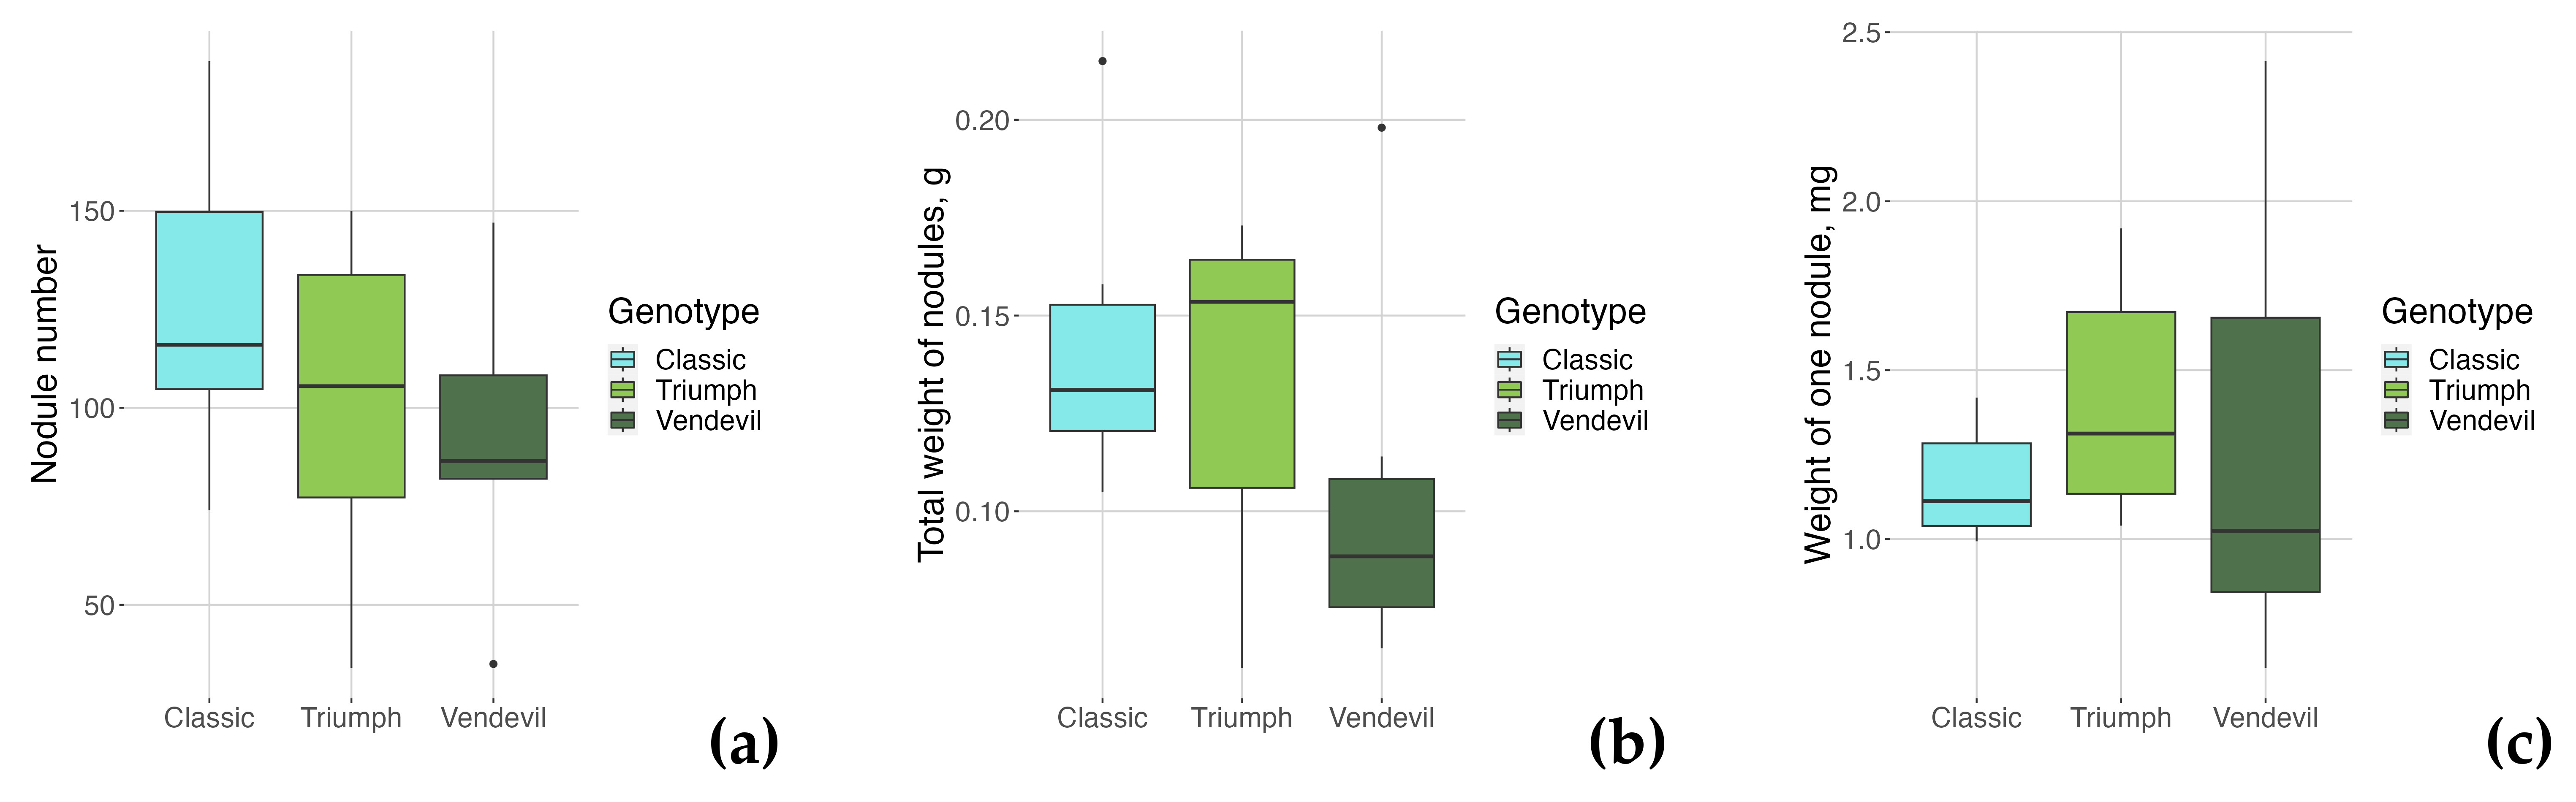

Supplement: Supplementary file 8 [file supplementary › Figure_S4.jpg]

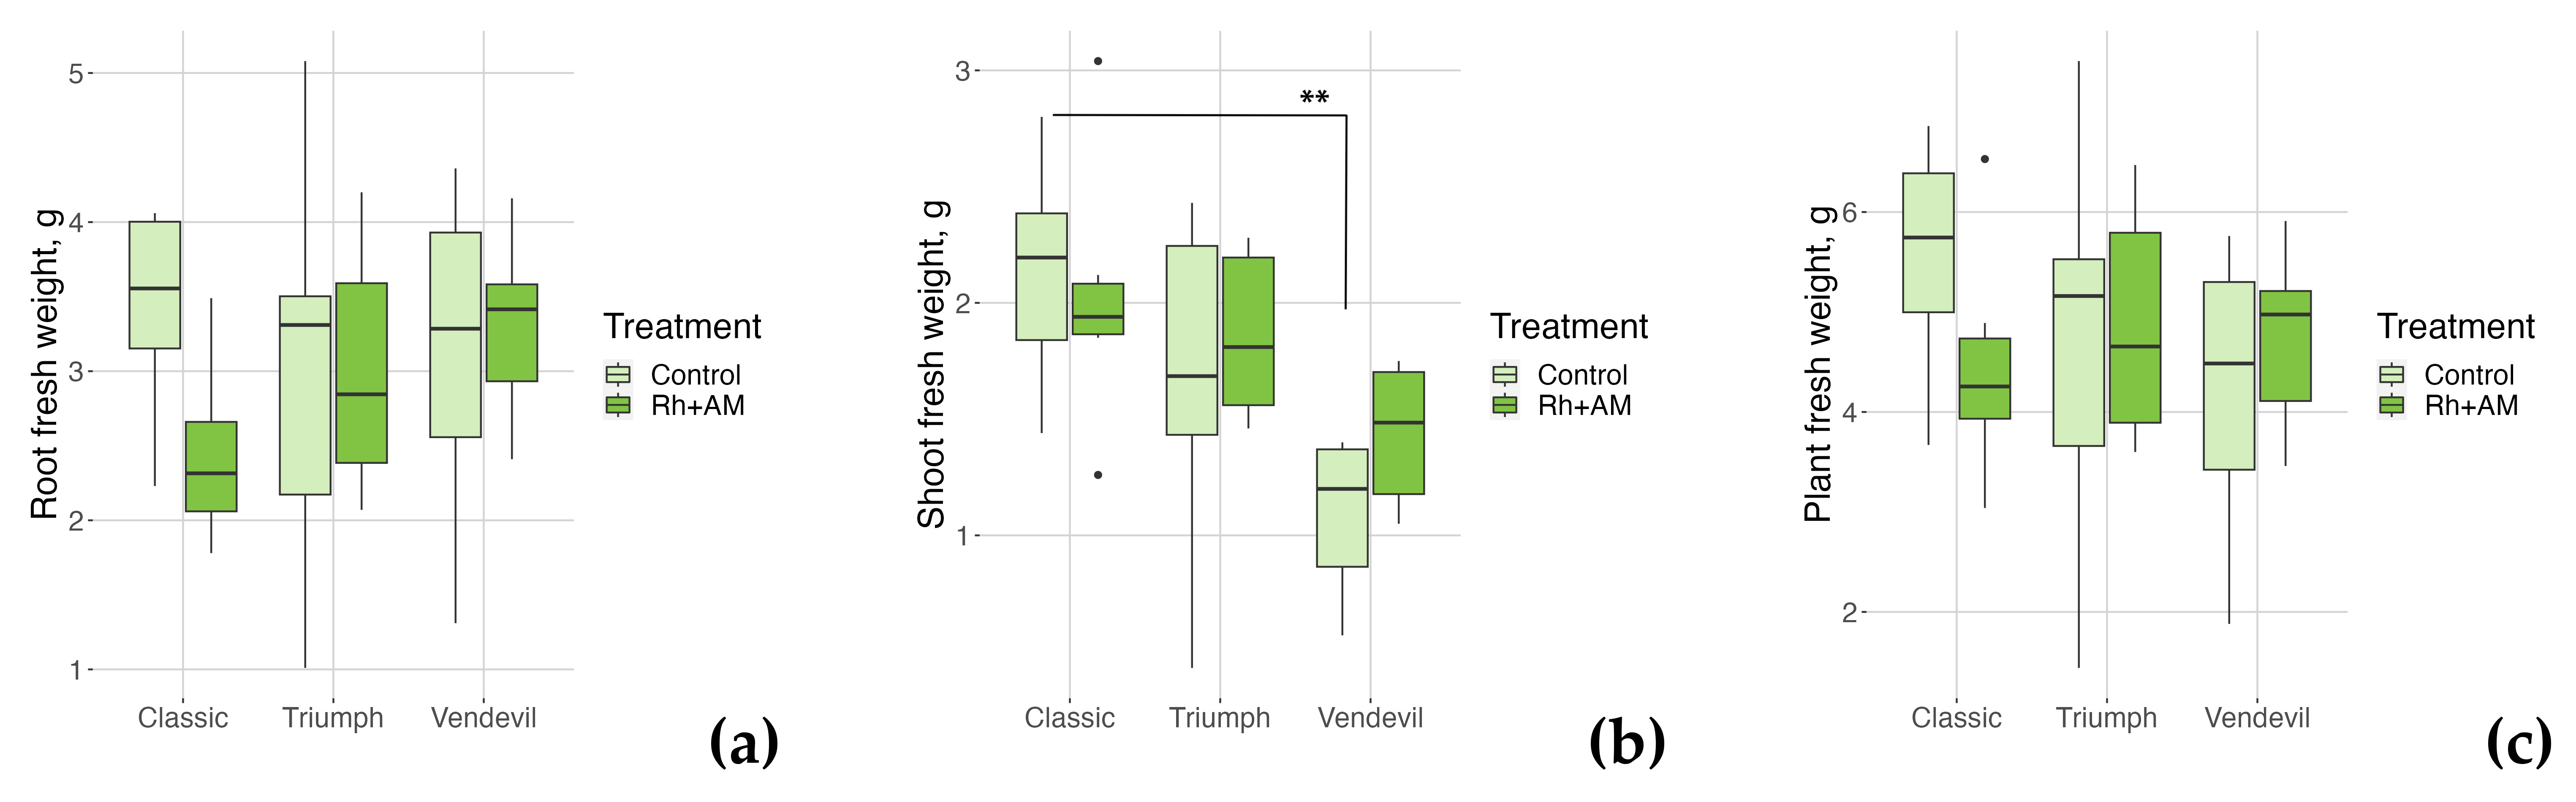

Supplement: Supplementary file 8 [file supplementary › Figure_S5.jpg]

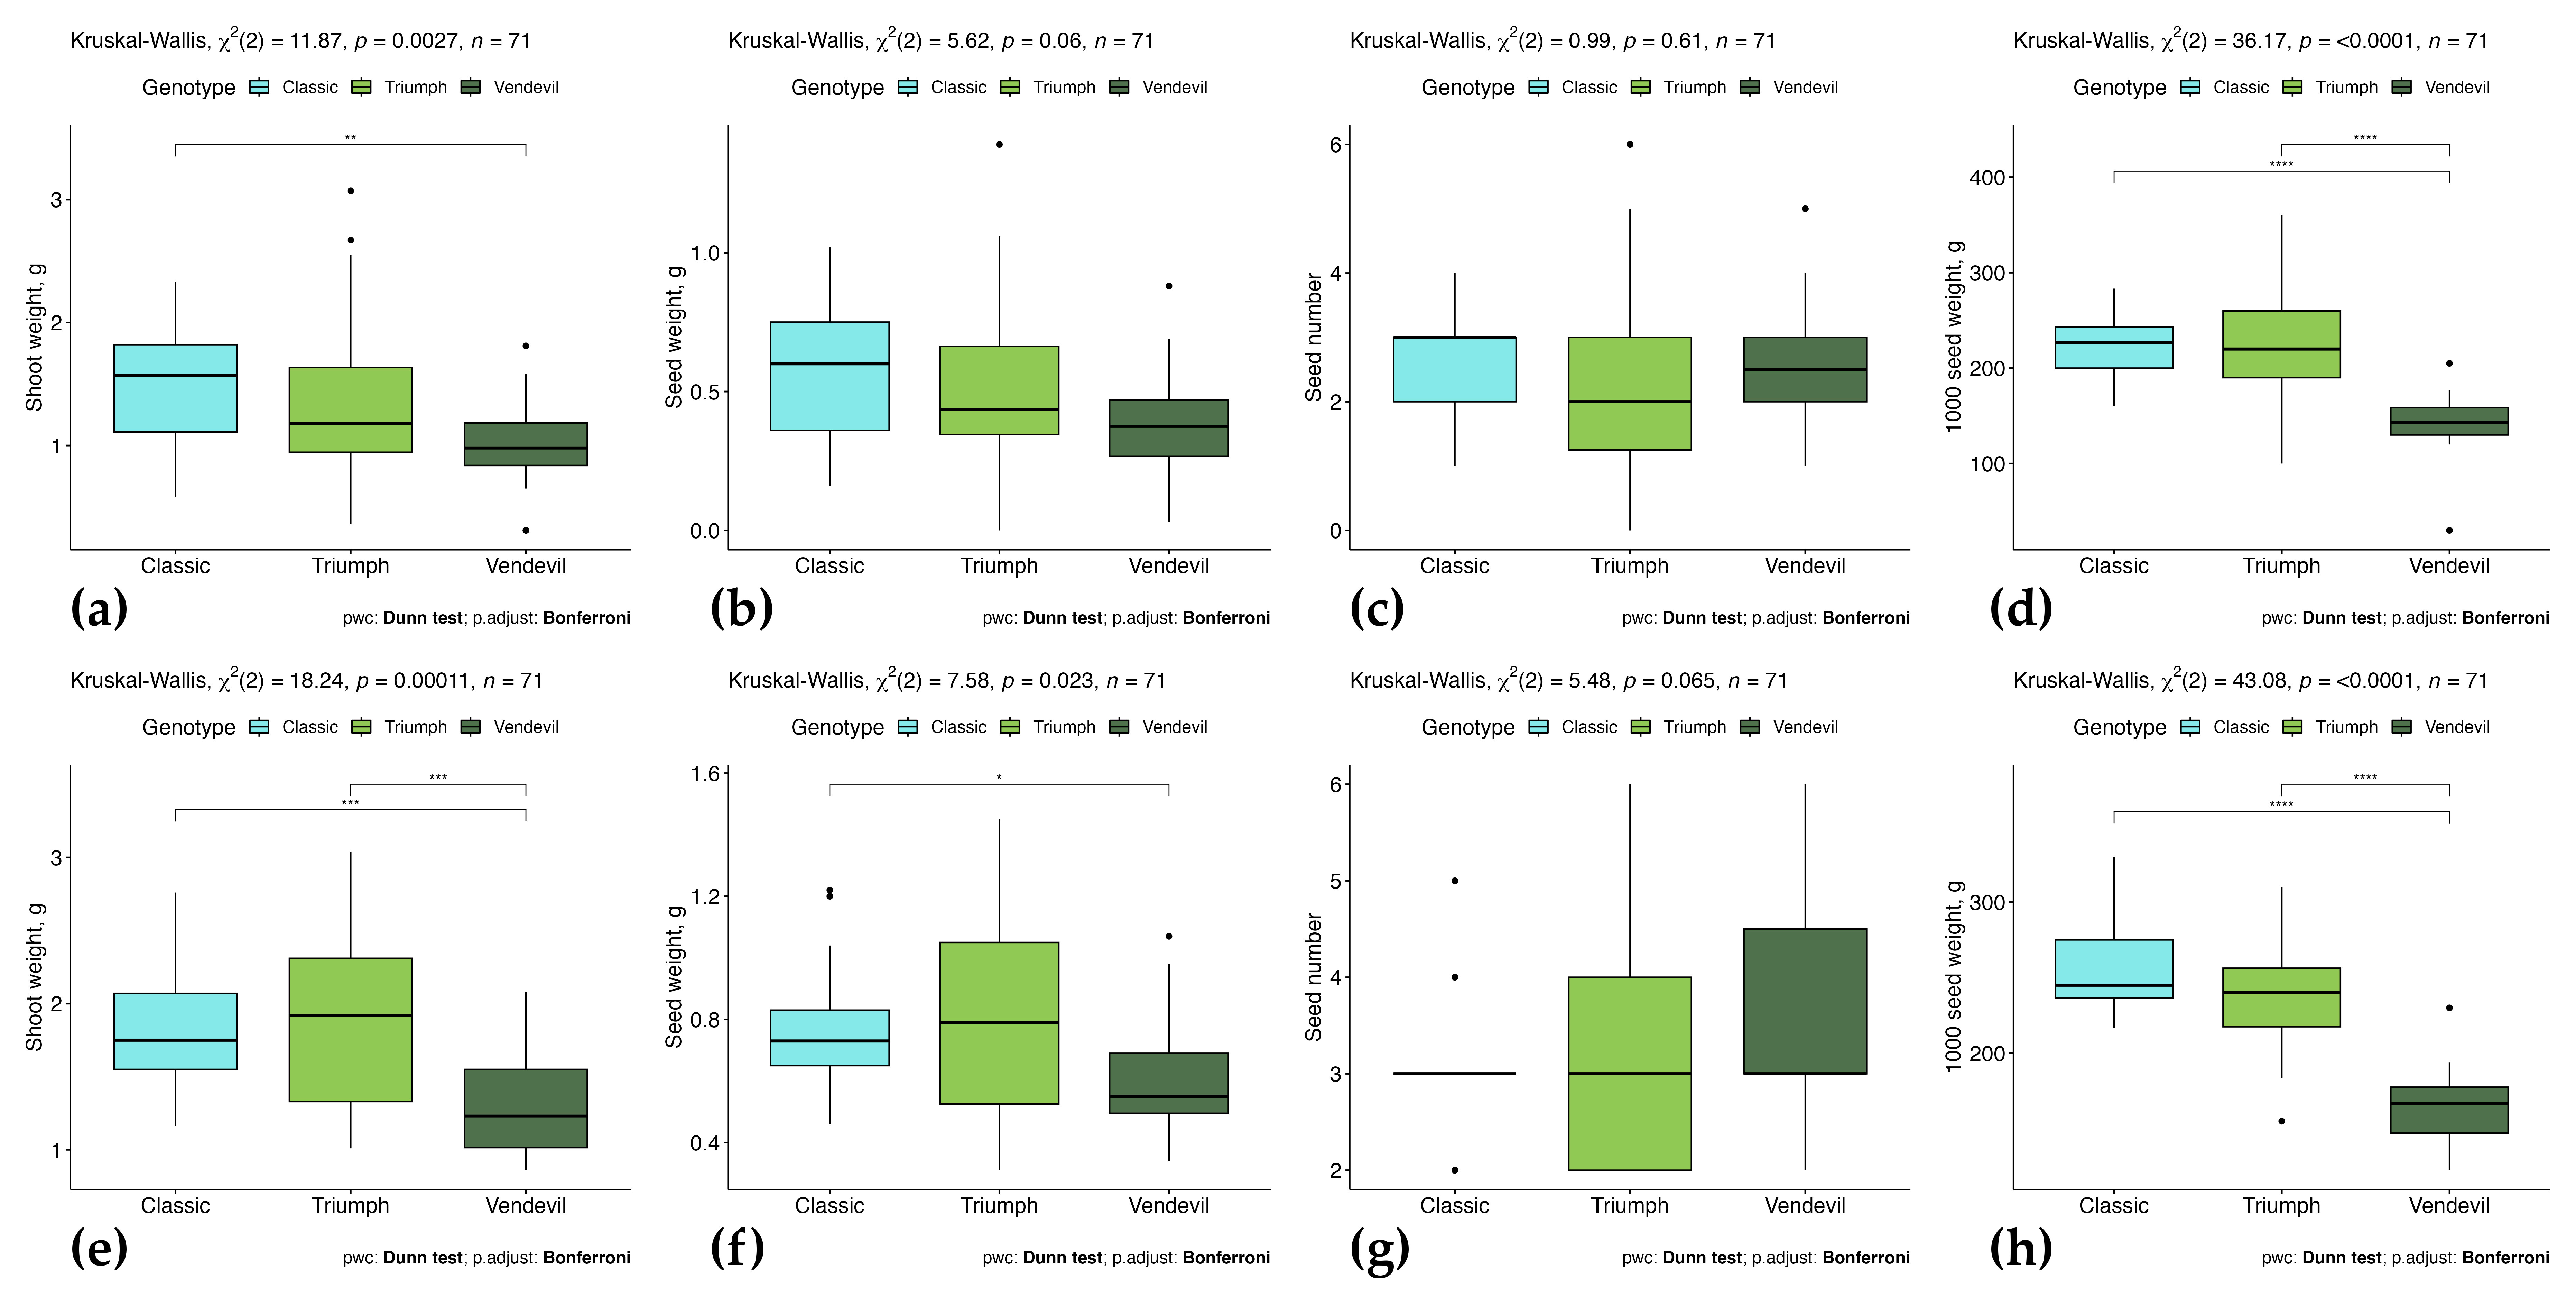

Supplement: Supplementary file 8 [file supplementary › Figure_S6.jpg]
